# Supplementary material
Source: Research Square preprint supplement (doi:10.21203/rs.3.rs-9924740/v1)

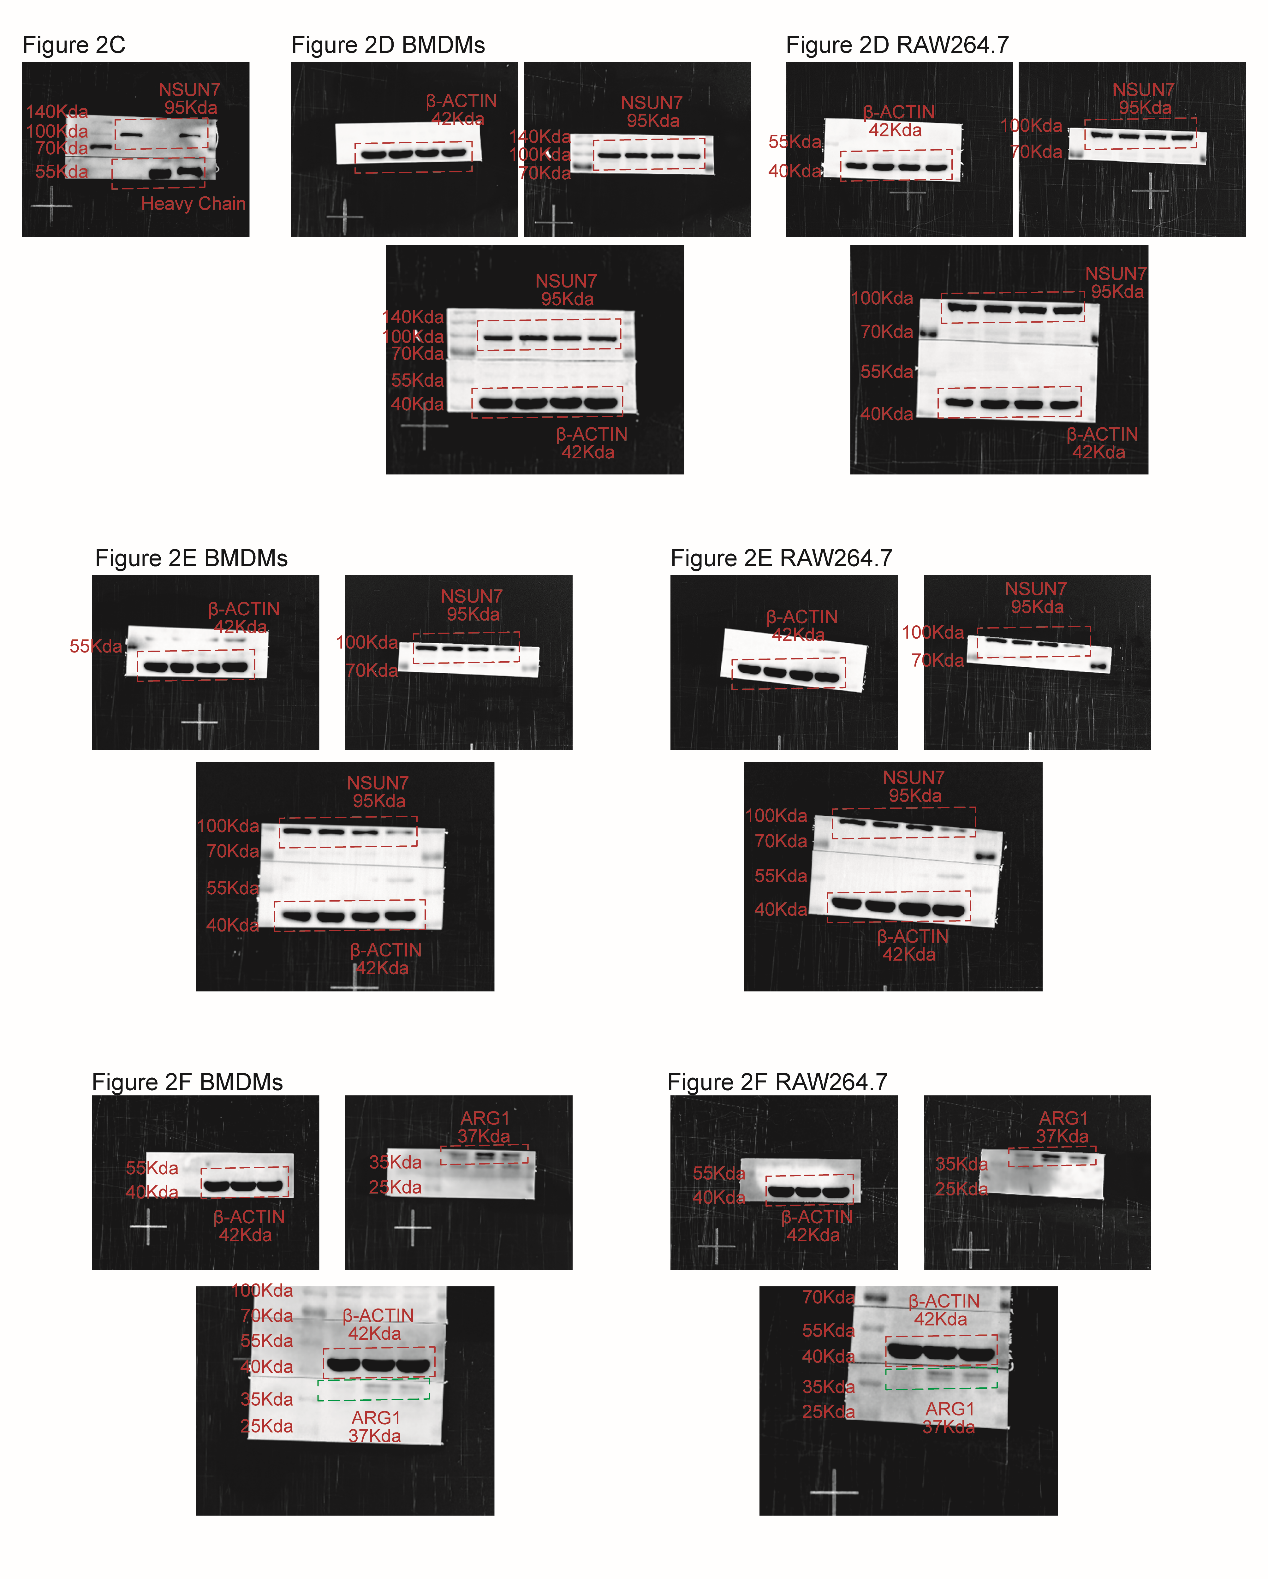


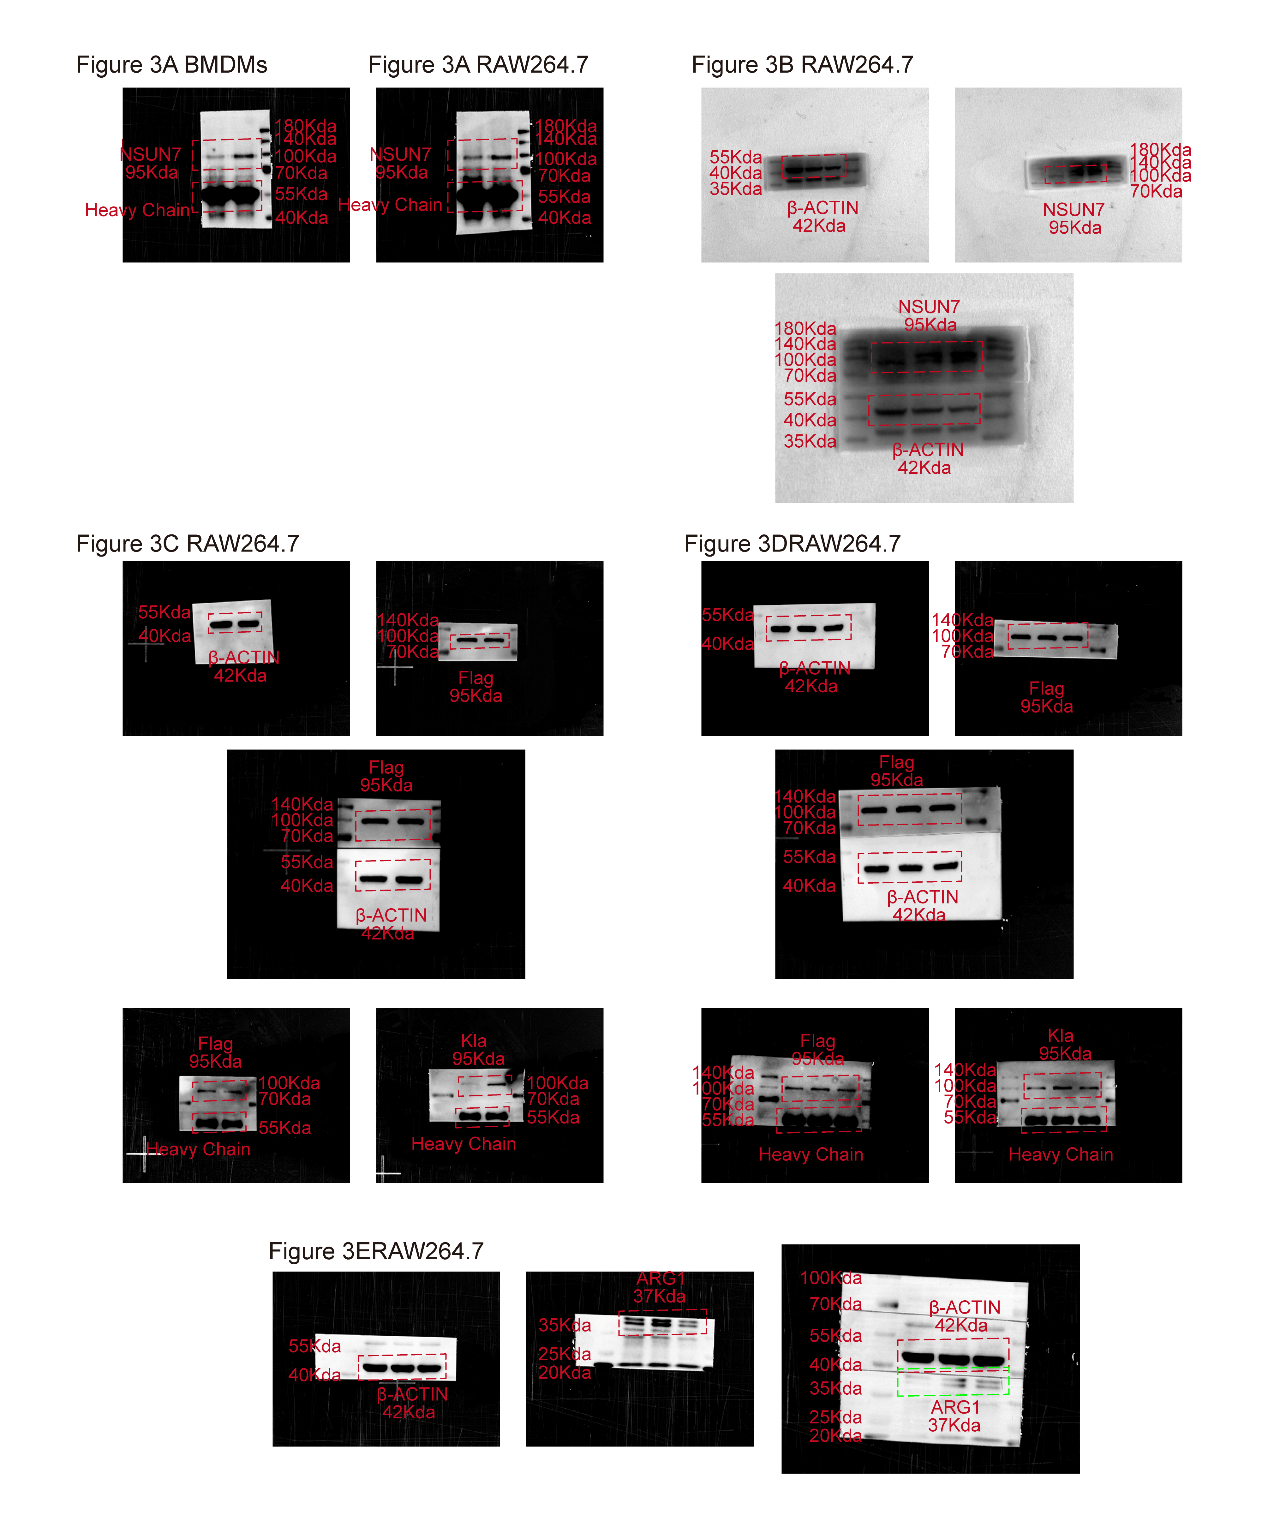


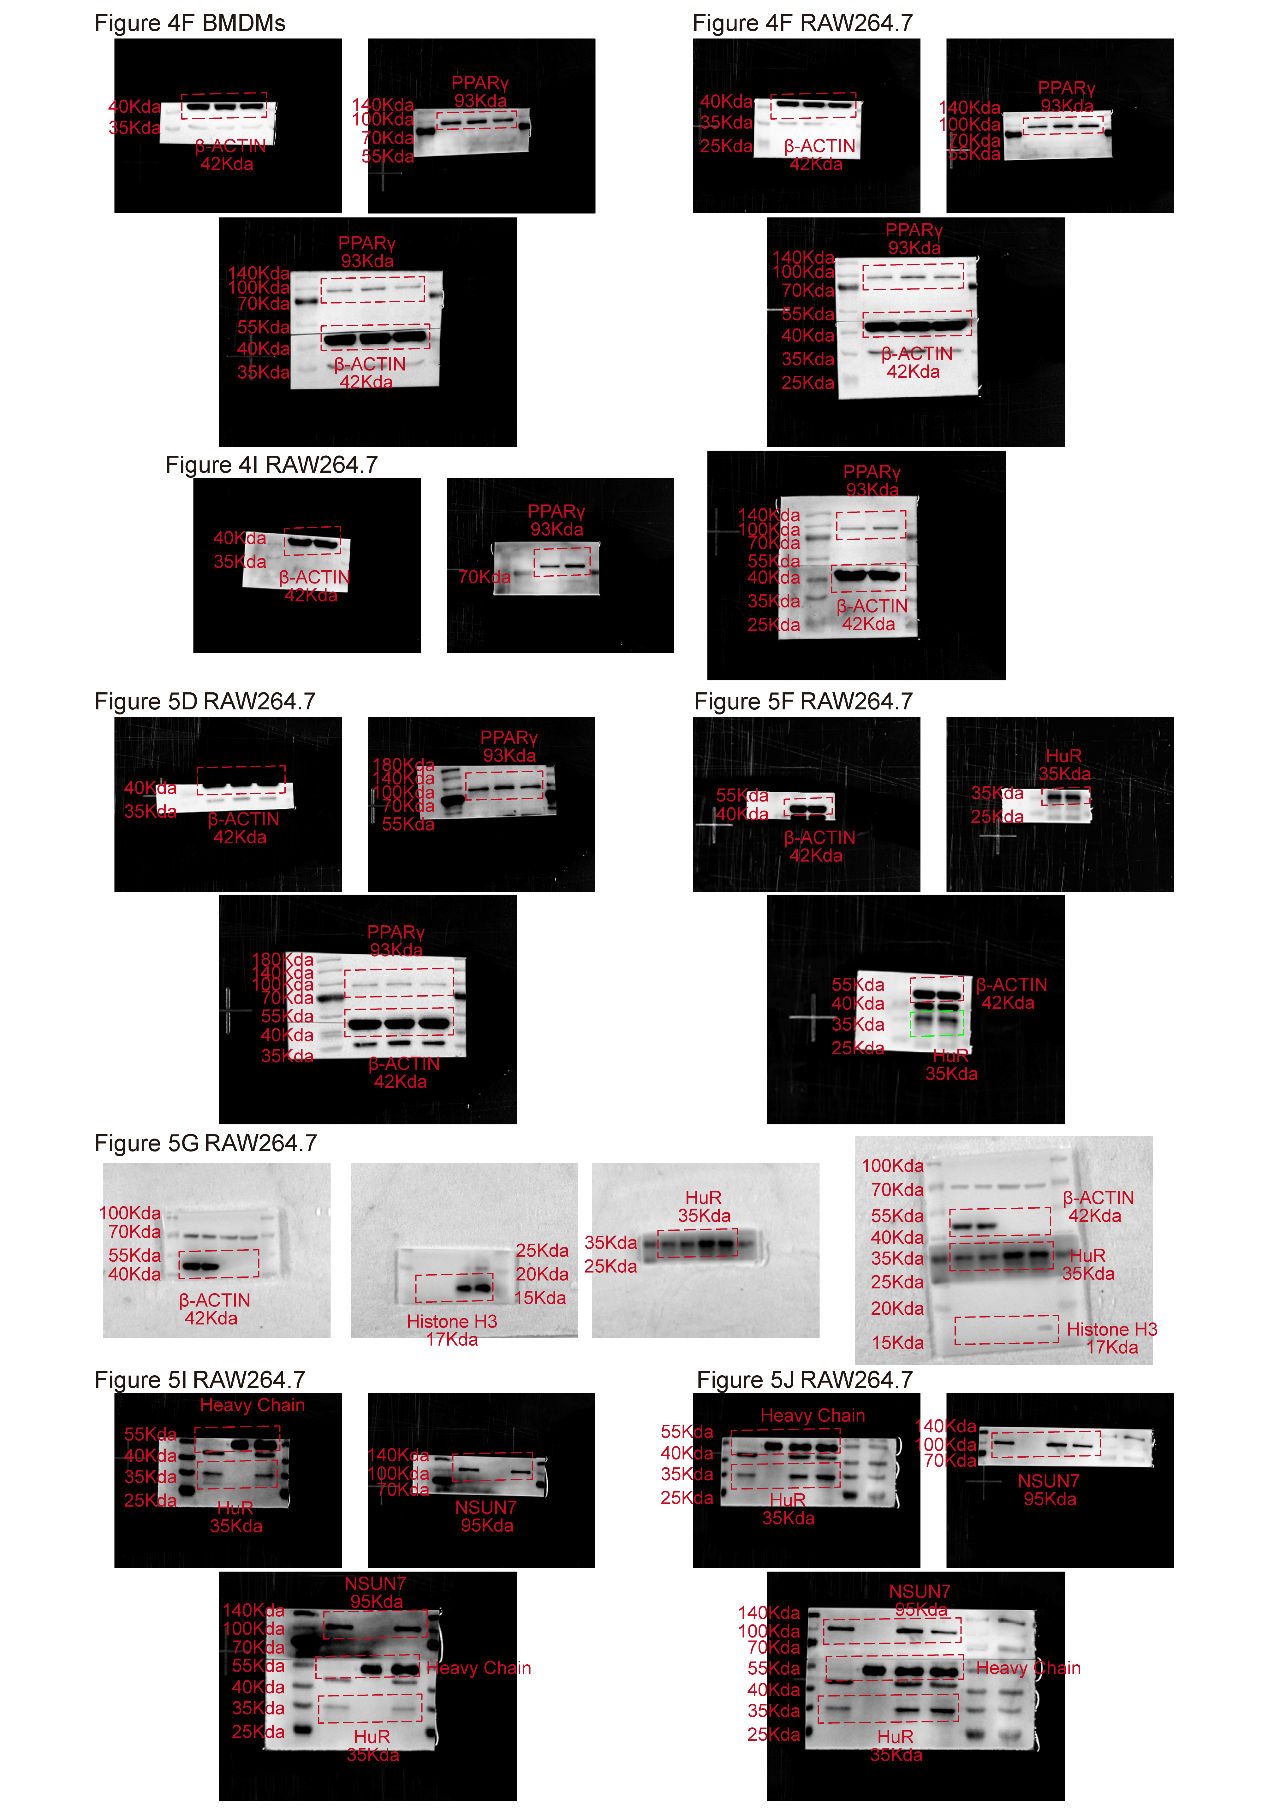


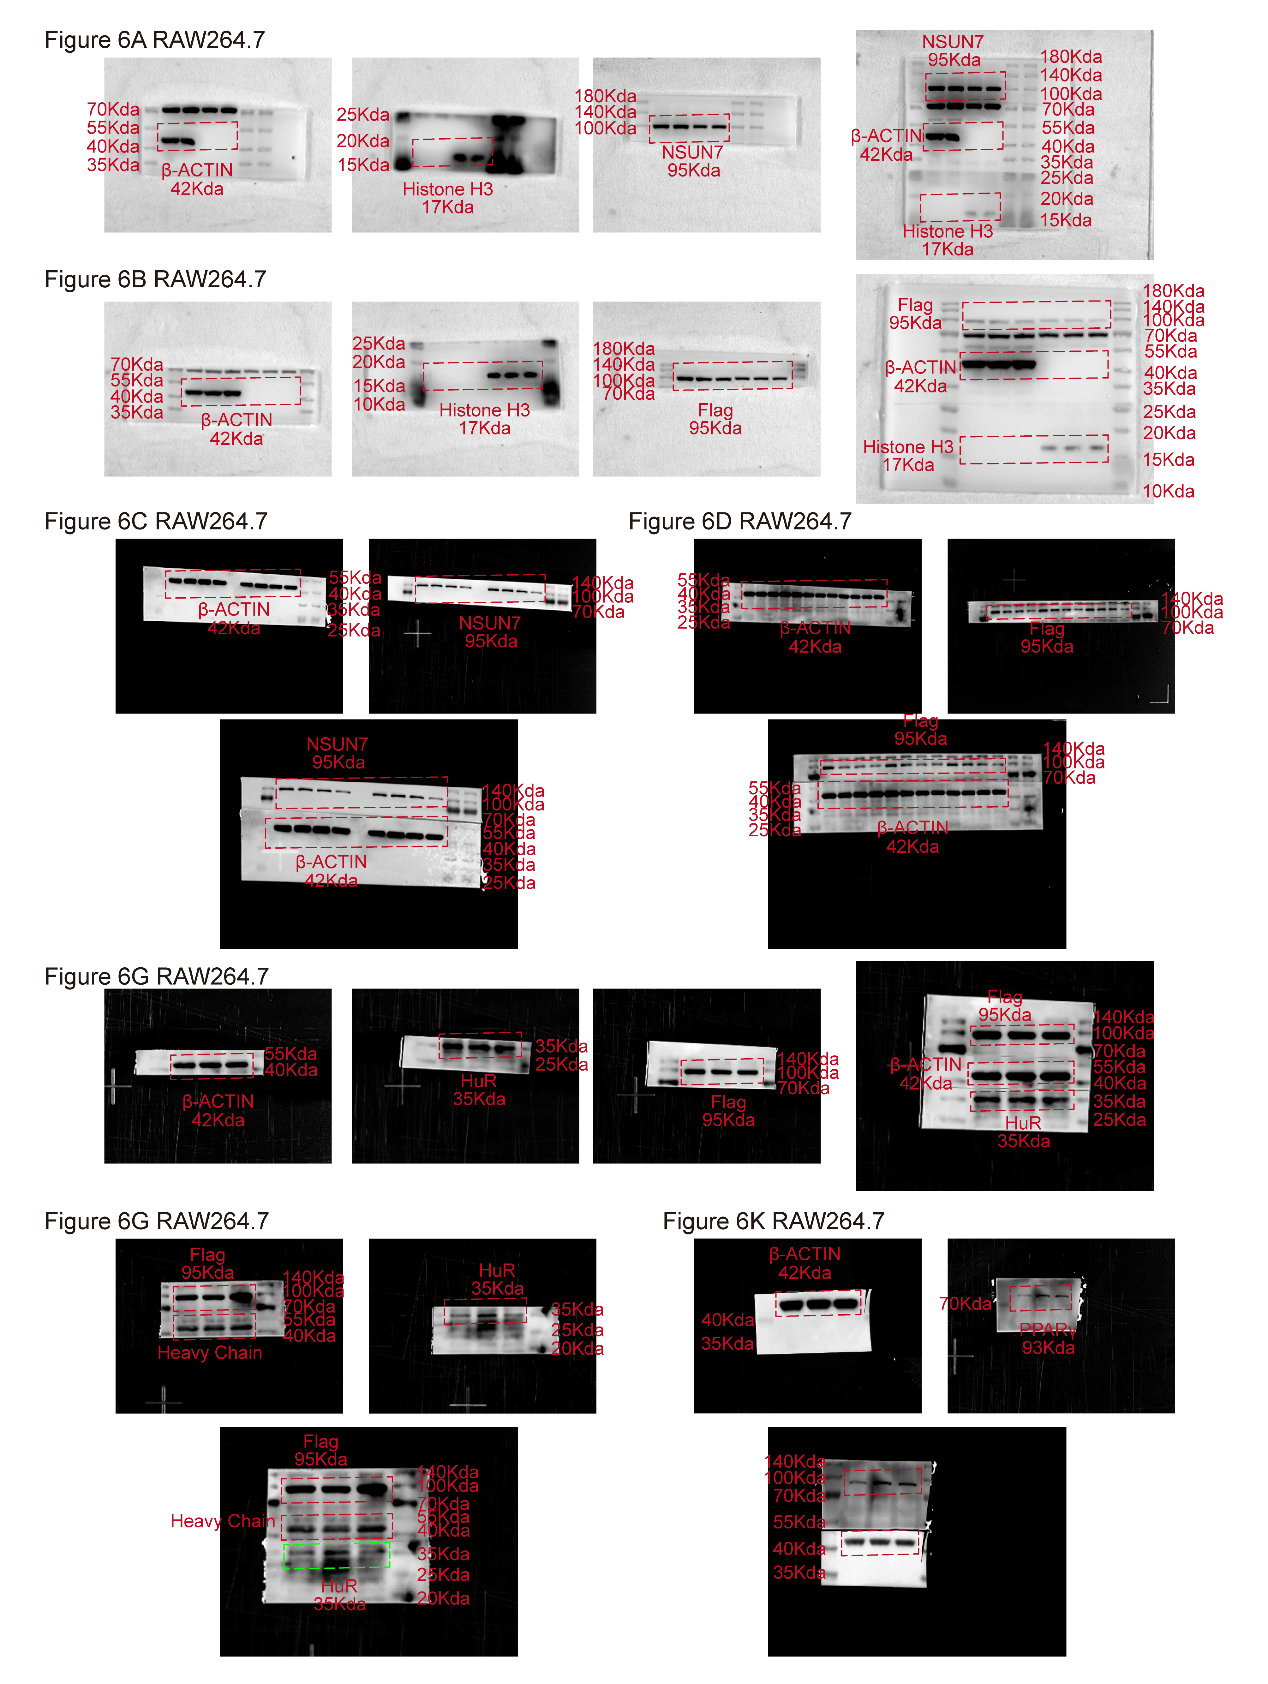


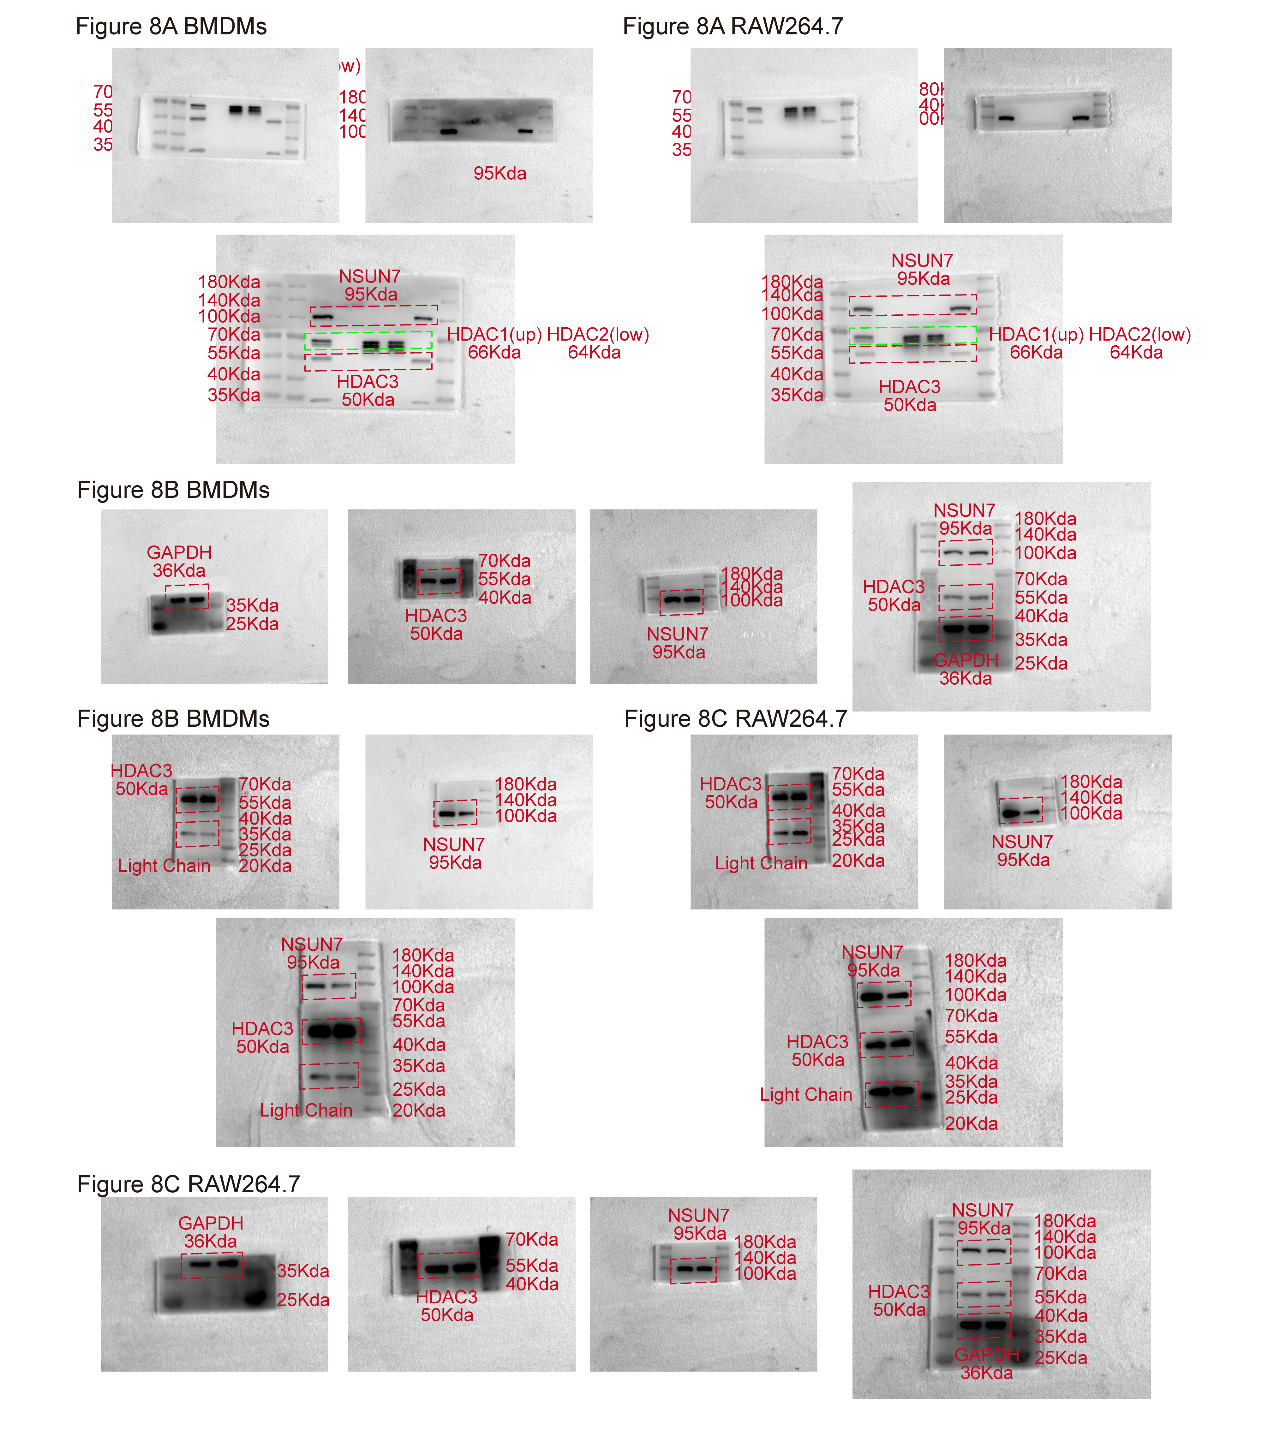


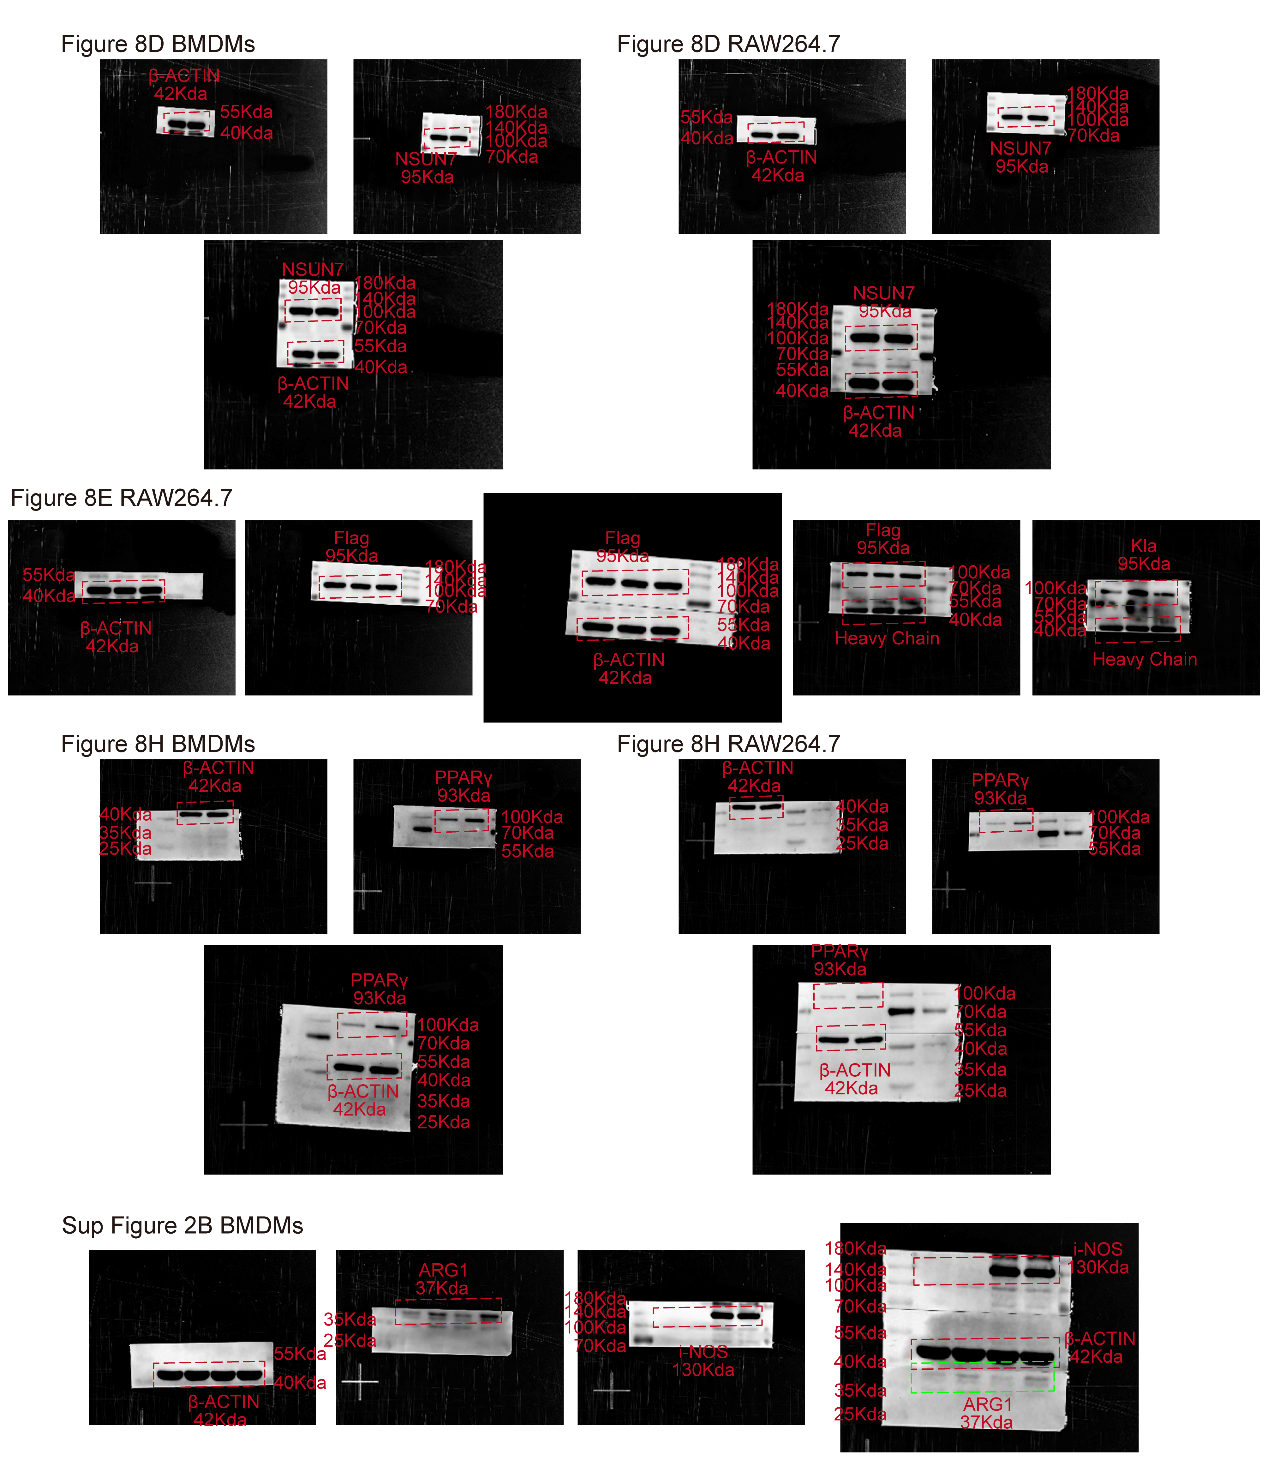

Supplement: Supplementary file 1 [file 78b6e6bd9d459a7fee3ec897.docx]
